# Supplementary material for: Clinical Impact of Implementing a Nurse-Led Adverse Drug Reaction Profile in Older Adults Prescribed Multiple Medicines in UK Primary Care: A Study Protocol for a Cluster-Randomised Controlled Trial
Source: MDPI journal article supplement (doi:10.3390/pharmacy10030052), 2022-04-28
Supplement: s1 [file s1]

Supplementary figure 1 (Figure S1): The logic model of ADRe intervention

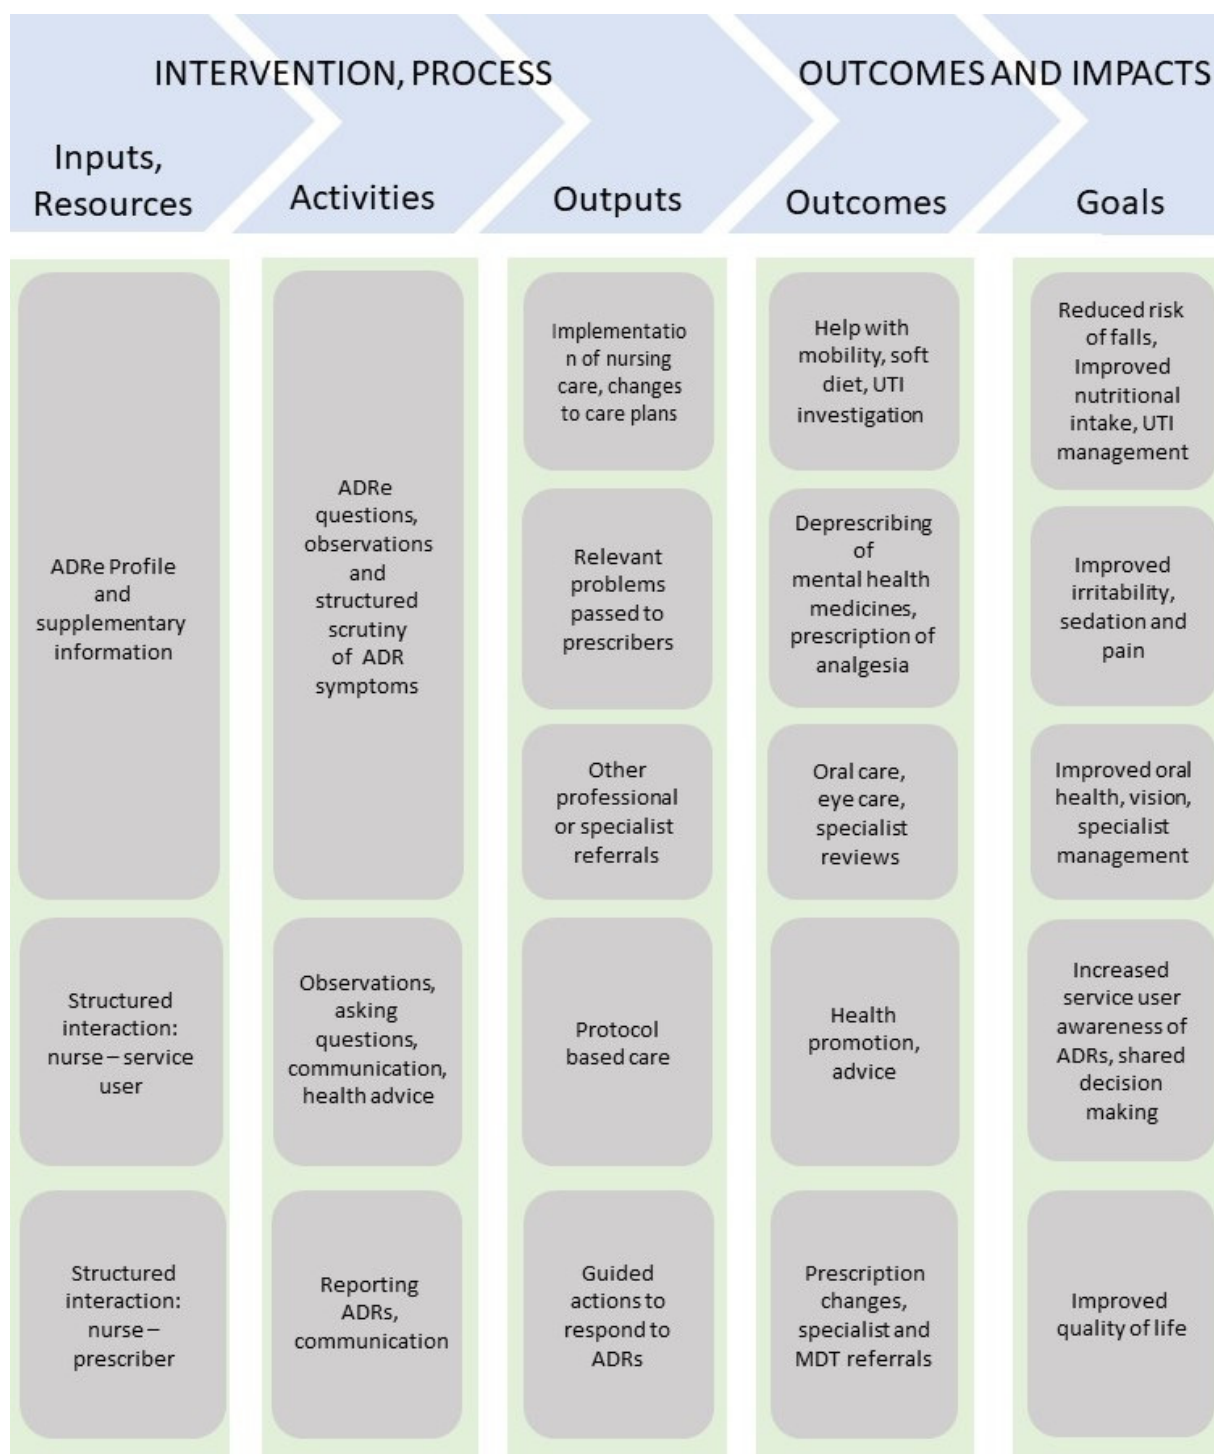

Notes: Model based on W.K. Kellogg Foundation Logic Model Development Guide (2004), and Knowlton (2012). Adapted from Jordan et al. (2018).
