# Supplementary material for: Clinical Impact of Implementing a Nurse-Led Adverse Drug Reaction Profile in Older Adults Prescribed Multiple Medicines in UK Primary Care: A Study Protocol for a Cluster-Randomised Controlled Trial
Source: MDPI journal article supplement (doi:10.3390/pharmacy10030052), 2022-04-28

Supplementary figure 2 (Figure S2): Model of the major concepts in the research framework

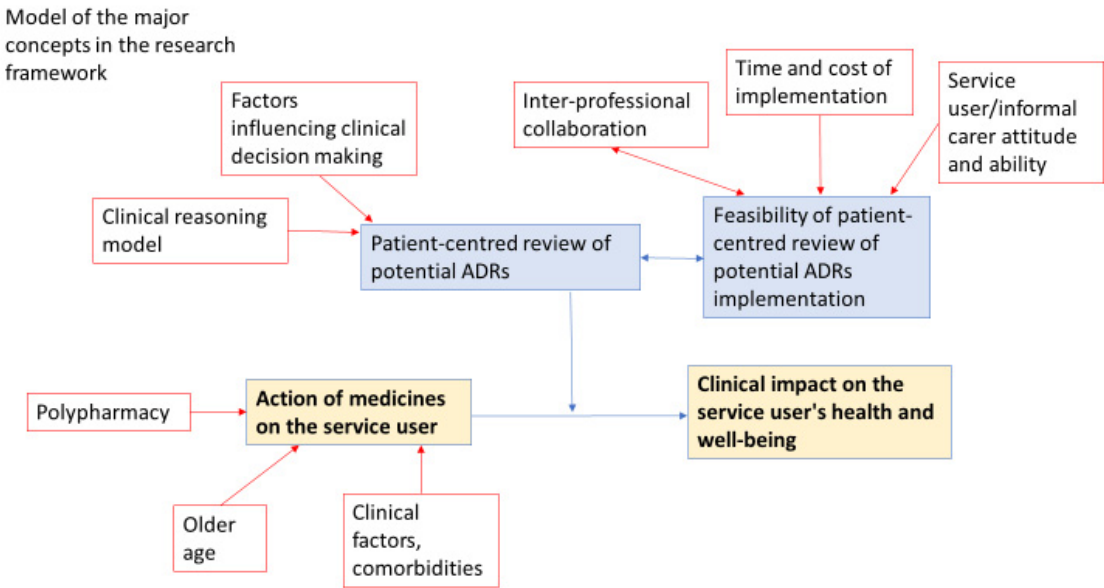

Construct: Effectiveness of the ADRe profile

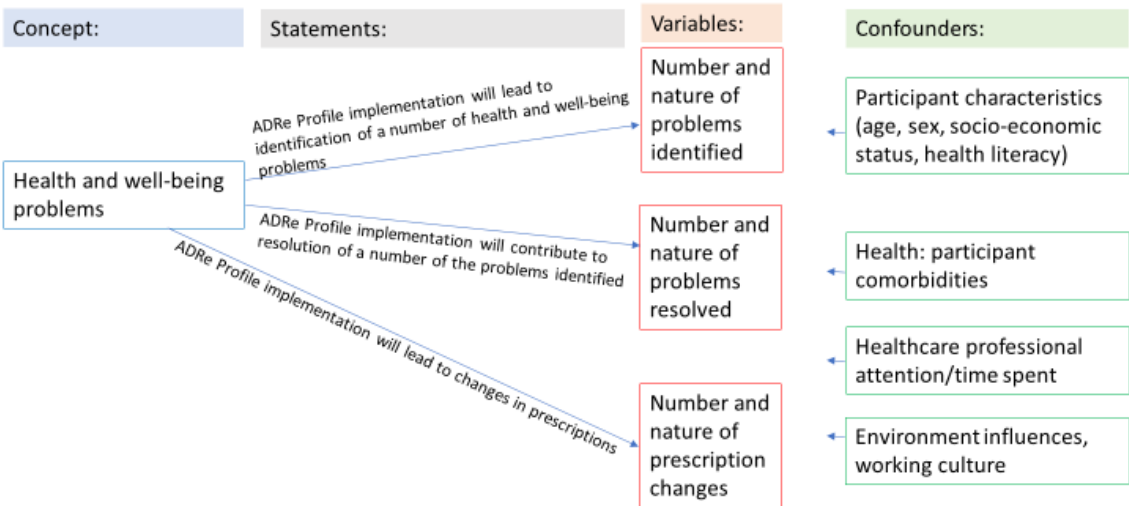

Construct: Feasibility  
of ADRe Profile implementation

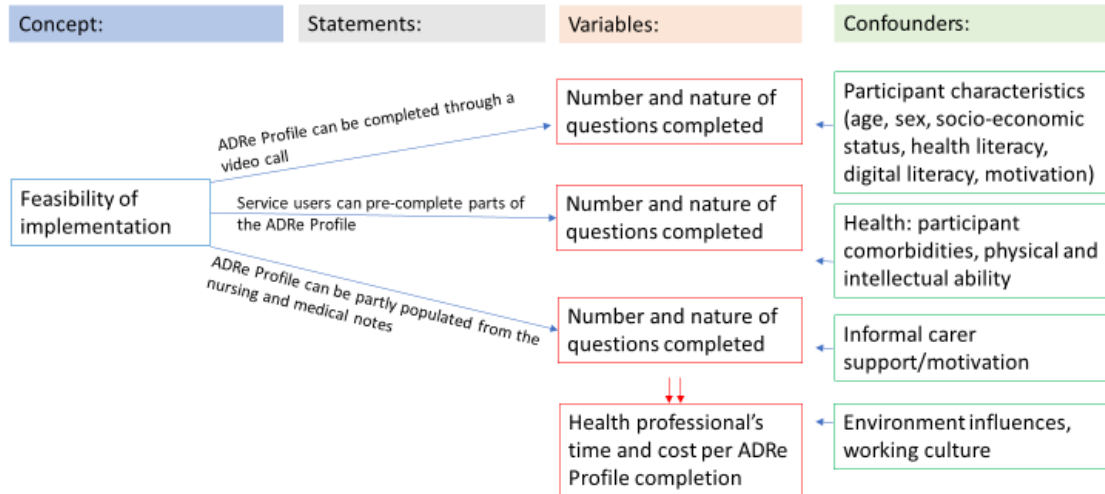

Supplement: s1 [file s1]
