# Supplementary material for: Clinical Impact of Implementing a Nurse-Led Adverse Drug Reaction Profile in Older Adults Prescribed Multiple Medicines in UK Primary Care: A Study Protocol for a Cluster-Randomised Controlled Trial
Source: MDPI journal article supplement (doi:10.3390/pharmacy10030052), 2022-04-28
Supplement: s1 [file s1]

Supplementary table 3 (Table S3): GANTT chart of research activities (D – data collection, I – intervention, R – randomisation)

[illegible]
