# Supplementary material for: Clinical Impact of Implementing a Nurse-Led Adverse Drug Reaction Profile in Older Adults Prescribed Multiple Medicines in UK Primary Care: A Study Protocol for a Cluster-Randomised Controlled Trial
Source: MDPI journal article supplement (doi:10.3390/pharmacy10030052), 2022-04-28
Supplement: s1 [file s1]

## Supplementary file 2 (File S2): Survey questions

### Primary outcome measures relating to the survey

- 1) Description of stakeholder views on the **effectiveness of implementing the ADRe Profile** (survey rating of the ADRe Profile - Likert scale). A brief survey will be distributed to the main stakeholders (patients, nurses, GP's and pharmacists) following completion of Randomised Controlled Trial
- 2) Description of stakeholder views on ADRe **Profile implementation feasibility** (eliciting interview themes). Semi-structured interview with a purposive sample of the main stakeholders (patients, nurses, GP's and pharmacists) to explore their views on feasibility of ADRe Profile integration in GP practices.

### Secondary outcome measures relating to Interviews/survey

- 3) Description of stakeholders' views on **multidisciplinary collaboration** (eliciting interview themes). Semi-structured interviews with the main stakeholders (patients, nurses, GP's and pharmacists) will explore their views on whether and how the ADRe Profile delivered clinical benefits and / or contributed to multidisciplinary collaboration between nurses, doctors and pharmacists.
- 4) Description of the patients' views on the **contribution of ADRe Profile to their health and well-being and patient-centred care** (eliciting interview themes). Semi-structured interviews with the patients will seek their views on whether and how ADRe Profile contributes to their health and well-being and patient-centred care. [Time Frame: 22 months from the start of the study]
- 5) **Time spent** completing one ADRe Profile

Survey for patients:

In your opinion, does the ADRe Profile benefit people who take multiple medicines? (1)

|    |                             |     |            |
|----|-----------------------------|-----|------------|
| No | Not yet but maybe in future | Yes | Don't know |
|----|-----------------------------|-----|------------|

Do you think you benefited from using the ADRe Profile? (1)

|    |                             |     |            |
|----|-----------------------------|-----|------------|
| No | Not yet but maybe in future | Yes | Don't know |
|----|-----------------------------|-----|------------|

If you benefited, how important was the benefit to you? (1)

|               |                    |                |            |
|---------------|--------------------|----------------|------------|
| Not important | Slightly important | Very important | Don't know |
|---------------|--------------------|----------------|------------|

*Possible probe question: Please describe any benefits you feel you received.*

How easy/difficult did you find completing the ADRe Profile independently? (2)

|           |                 |      |            |
|-----------|-----------------|------|------------|
| Difficult | Relatively easy | Easy | Don't know |
|-----------|-----------------|------|------------|

*Possible probe question: Please tell us what was difficult and what was easy. This will help us improve in the future.*

How long did you spend completing the ADRe Profile independently? (5)

|         |         |         |                  |
|---------|---------|---------|------------------|
| 15 mins | 30 mins | 45 mins | 1 hour or longer |
|---------|---------|---------|------------------|

How easy/difficult did you find completing the ADRe Profile with the nurse/researcher? (2)

|           |                 |      |            |
|-----------|-----------------|------|------------|
| Difficult | Relatively easy | Easy | Don't know |
|-----------|-----------------|------|------------|

*Possible probe question: Please tell us what was difficult and what was easy. This will help us improve in the future.*

How long did it take to complete the ADRe Profile with the nurse/researcher? (5)

|         |         |         |                  |
|---------|---------|---------|------------------|
| 15 mins | 30 mins | 45 mins | 1 hour or longer |
|---------|---------|---------|------------------|

Would you be willing/able to complete the ADRe Profile regularly (4 times per year) to contribute to your medications review? (2)

|    |                     |     |            |
|----|---------------------|-----|------------|
| No | Yes, but less often | Yes | Don't know |
|----|---------------------|-----|------------|

How would you rate the health nurses', doctors' and pharmacists' collaboration during the ADRe project? (3)

|      |      |           |            |
|------|------|-----------|------------|
| Poor | Good | Excellent | Don't know |
|------|------|-----------|------------|

*Possible probe question: Please tell us why you gave this rating.*

Was your unique experience taken into account, did you feel you were listened to? (4)

|    |                     |            |            |
|----|---------------------|------------|------------|
| No | Yes, to some extent | Yes, a lot | Don't know |
|----|---------------------|------------|------------|

|  |  |  |  |
|--|--|--|--|
|  |  |  |  |
|--|--|--|--|

*Possible probe question: Please tell us why you gave this rating.*

Did you feel involved in planning and decisions made about your care when using the ADRe Profile? (4)

|    |                     |            |            |
|----|---------------------|------------|------------|
| No | Yes, to some extent | Yes, a lot | Don't know |
|----|---------------------|------------|------------|

*Possible probe question: Please tell us why you gave this rating.*

Is there anything else you would like us to know?

|  |
|--|
|  |
|--|

Thank you for your time in completing this survey.
